# Supplementary material
Source: PubMed Central journal article supplement (PMC9173715)
Supplement: NIHMS1759926-supplement-1.pdf [file NIHMS1759926-supplement-1.pdf]

Supplementary Materials for  
**Freeform Cell-Laden Cryobioprinting for Shelf-Ready  
Tissue Fabrication and Storage**

Hossein Ravanbakhsh, Zeyu Luo, Xiang Zhang, Sushila Maharjan, Hengameh Sadat Mirkarimi,  
Guosheng Tang, Carolina Chávez-Madero, Luc Mongeau, Yu Shrike Zhang\*

\*Corresponding author. Email: [yszhang@research.bwh.harvard.edu](mailto:yszhang@research.bwh.harvard.edu)

**This PDF file includes:**

Figures S1 to S20  
Tables S1 to S3

**Other Supplementary Materials for this manuscript include the following:**

Movies S1 to S9

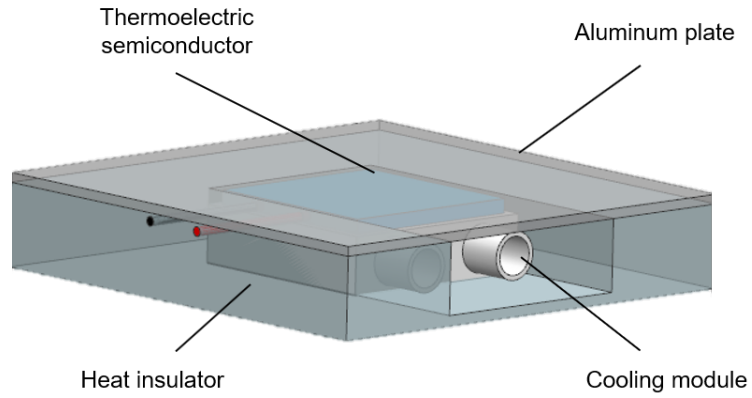

**Figure S1.**

**Schematic of the freezing plate used as the substrate for cryobioprinting.** The freezing plate was cooled using a pair of semiconductors, which were powered by a DC voltage-generator. The surface temperature could be adjusted by changing the output voltage on the DC power. The semiconductors were cooled down *via* a water-based cooling module.

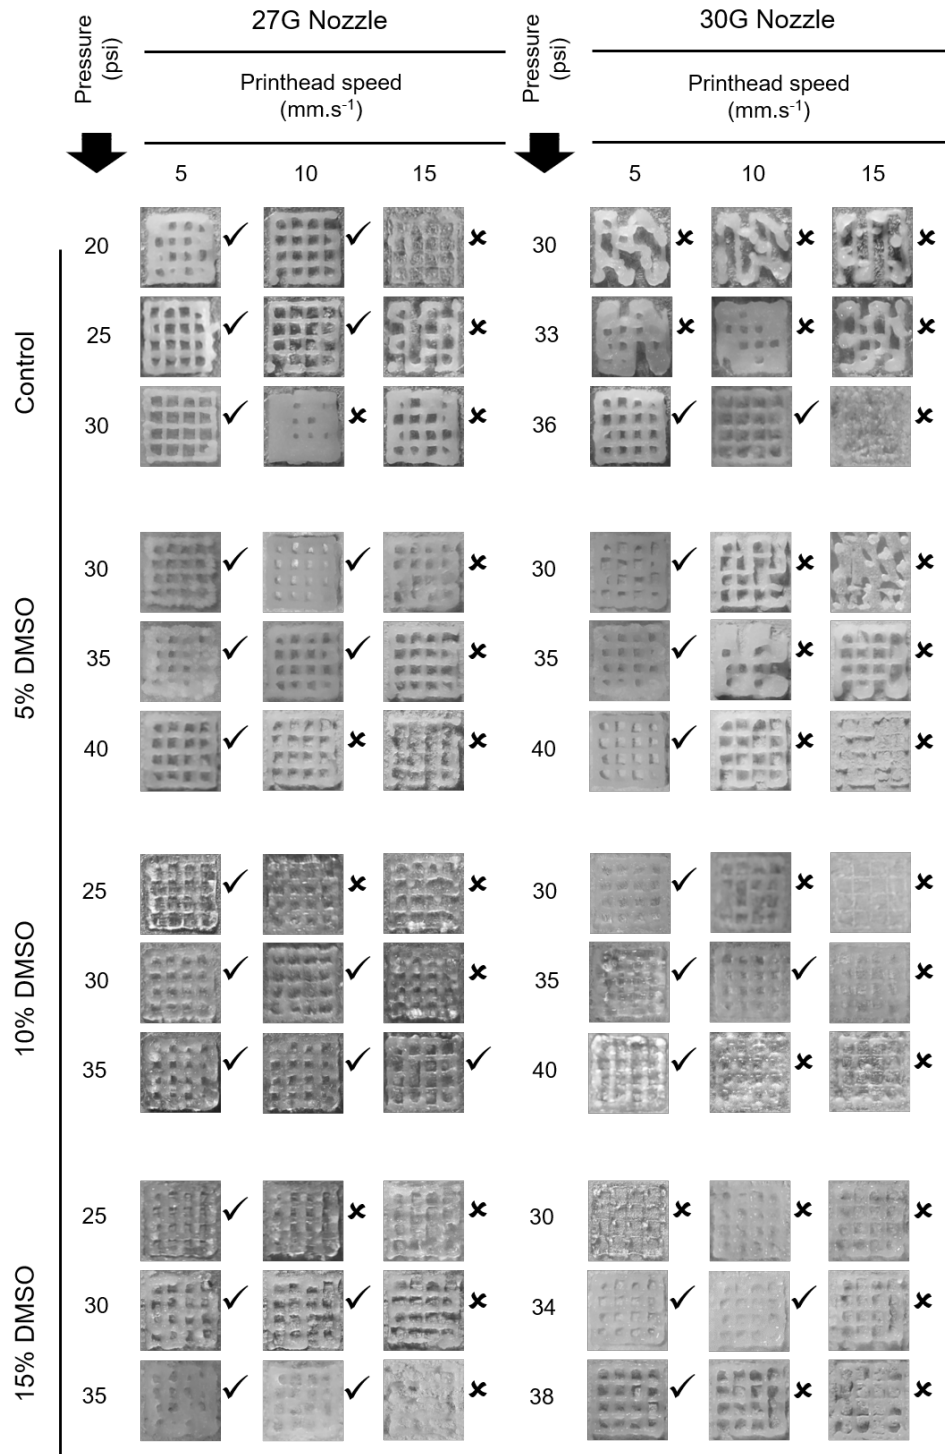

**Figure S2.**

**Effects of nozzle size, pressure, printhead moving speed, and DMSO concentration on the printability of the cryoprotective GelMA bioink by comparing cryobioprinted 8×8-mm<sup>2</sup> grids.** The checkmarks were used to denote the high-fidelity samples with structural integrity over 90% of the printed grids, *i.e.*, acceptable samples, while the cross signs represent

poor/unsuccessful cryobioprinting jobs. The addition of DMSO as the CPA had negligible effects on the printability of GelMA.

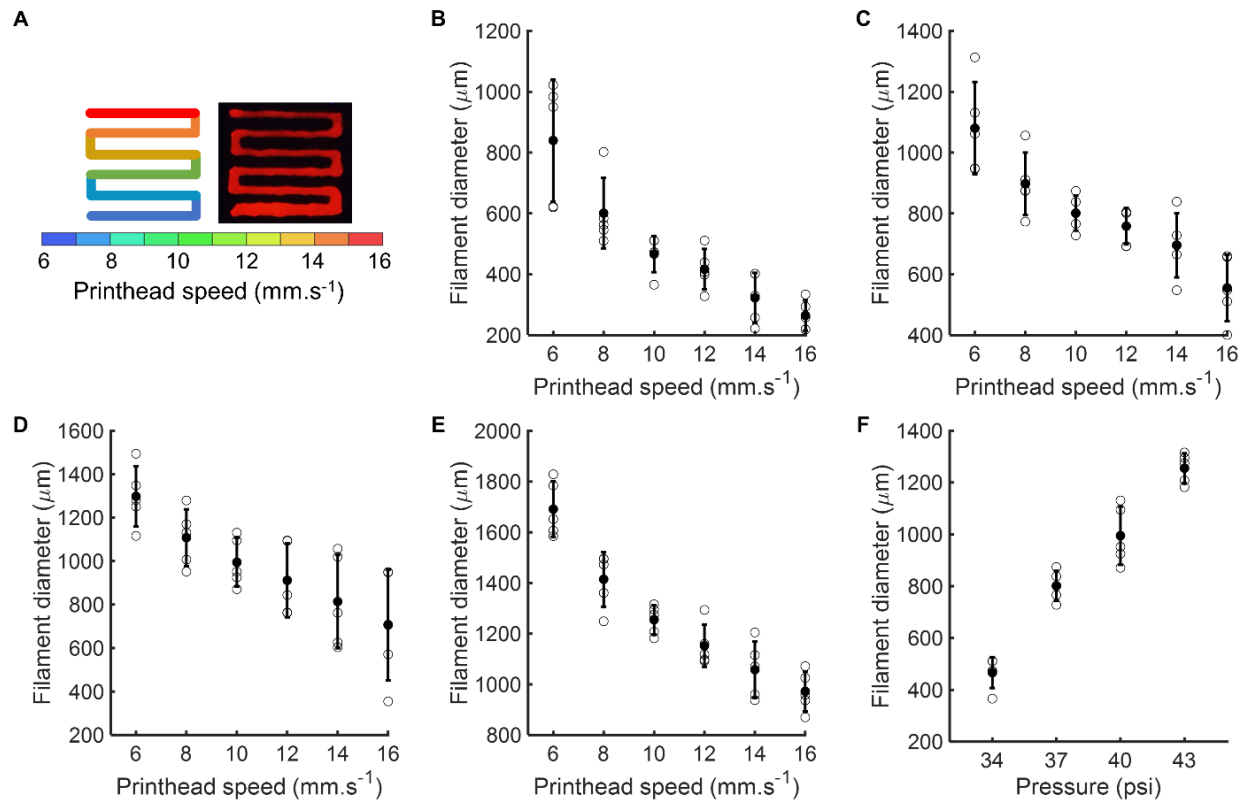

**Figure S3.**

**Effects of printhead moving speed and pressure on filament diameter.** (A), Bioprinting of a continuous filament using a 27G nozzle with different moving speeds for parametrically studying the effect of pressure (P) and speed (V) on the filament diameter. (B), P=34 psi. (C), P=37 psi. (D), P=40 psi. (E), P=43 psi. (F), V=10  $\text{mm}\cdot\text{s}^{-1}$ . n = 5.

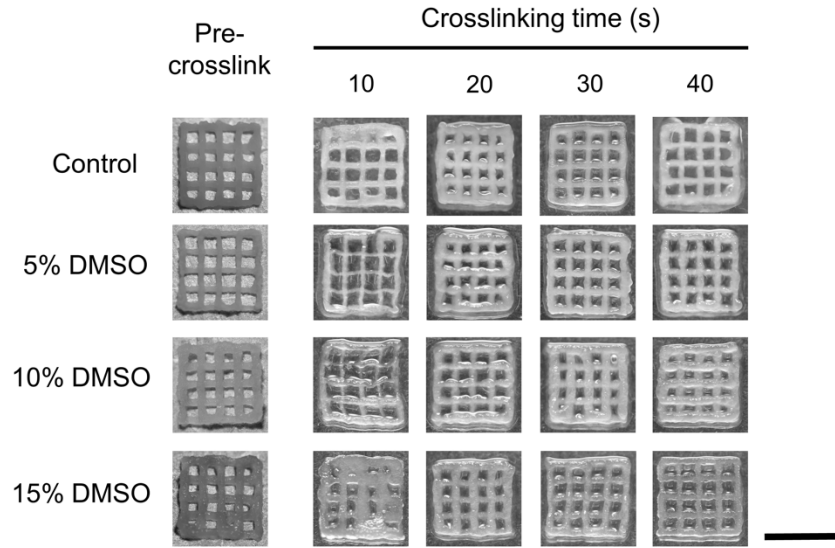

**Figure S4.**

**The effect of UV exposure time on the fidelity of the cryobioprinted grid structures.** The samples with 10 s of UV crosslinking were not fully crosslinked as the exposure time was not adequate. Scale bar: 8 mm.

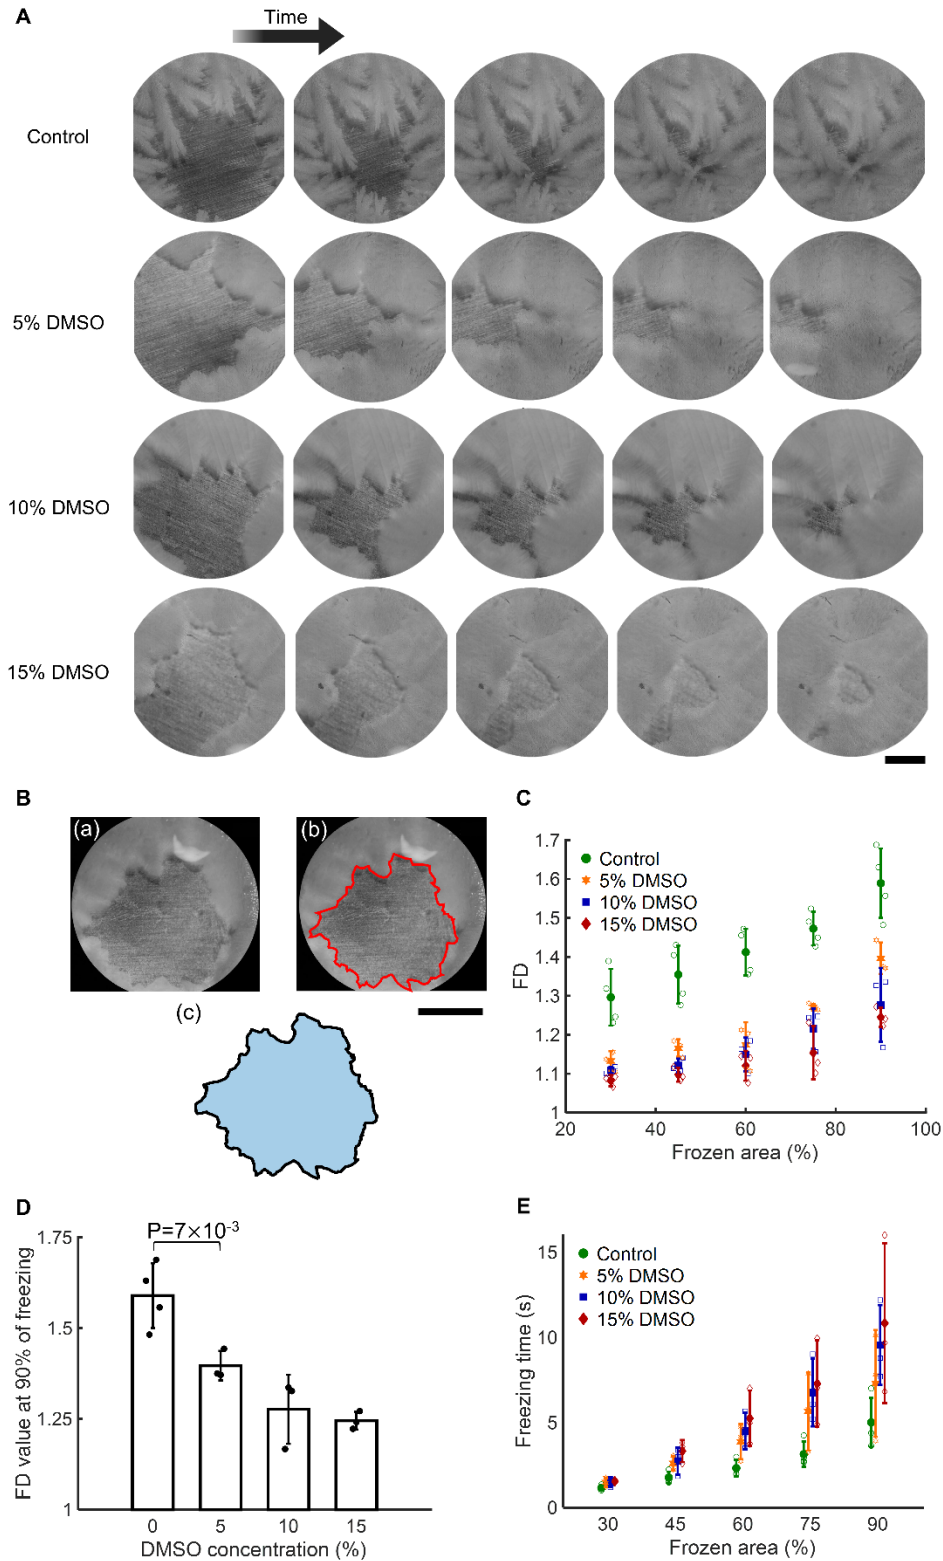

**Figure S5.**  
**Ice crystal-formation in the freezing processes of GelMA hydrogel groups with different concentrations of DMSO.** (A), Representative brightfield time-lapse images of the hydrogel

groups during ice crystal-formation. The shape and the size of the ice crystals were clearly different in the DMSO-free sample. Scale bar: 2 mm. **(B)**, Identifying the ice crystals' borderline in a representative image for quantifying the sharpness of the ice crystals. The unfrozen portion of the hydrogel derived as a polygon in panel (c) was used to quantify the ice crystals' sharpness. Scale bar: 2 mm. **(C)**, Trend of changes in FD during the hydrogel freezing process. When the sharp crystals formed, the irregularities in the polygon geometry increased, which resulted in a higher FD value. **(D)**, FD values for different hydrogels when 90% of the samples in the microscope's field of view became frozen. **(E)**, Comparison of the freezing times for different hydrogel bioink groups. The addition of DMSO generally increases the freezing time.  $t=0$  corresponds to when the frozen area is approximately 25% of the microscope's field of view.  $n = 4$ .



**A**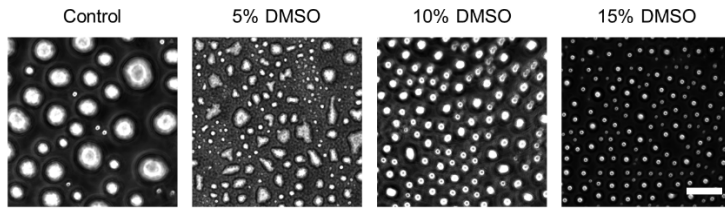**B**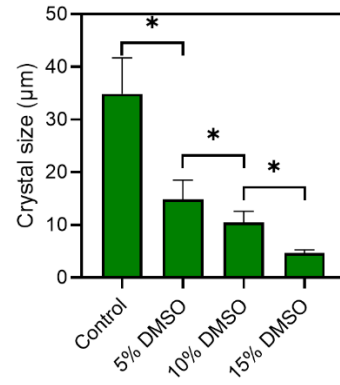**Figure S6.**

**Effect of DMSO on ice recrystallization-inhibition determined *via* the splat assay. (A),** Photographs showing ice crystals grown in GelMA wafers with different concentrations of DMSO. Scale bar: 50 µm. **(B),** Quantification of the ice crystal size for the study groups. n = 3; \*P < 0.05.

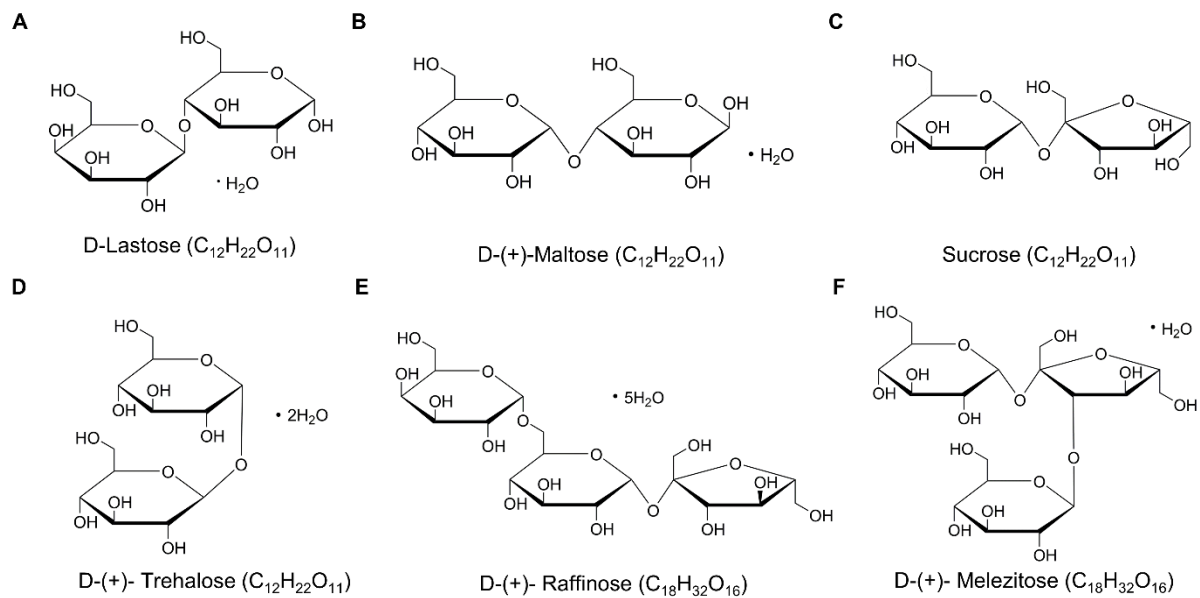

**Figure S7.**

**Chemical structures of the investigated saccharides for cryobioprinting. (A), Lactose. (B), Maltose. (C), Sucrose. (D), Trehalose. (E), Raffinose. (F), Melezitose.**

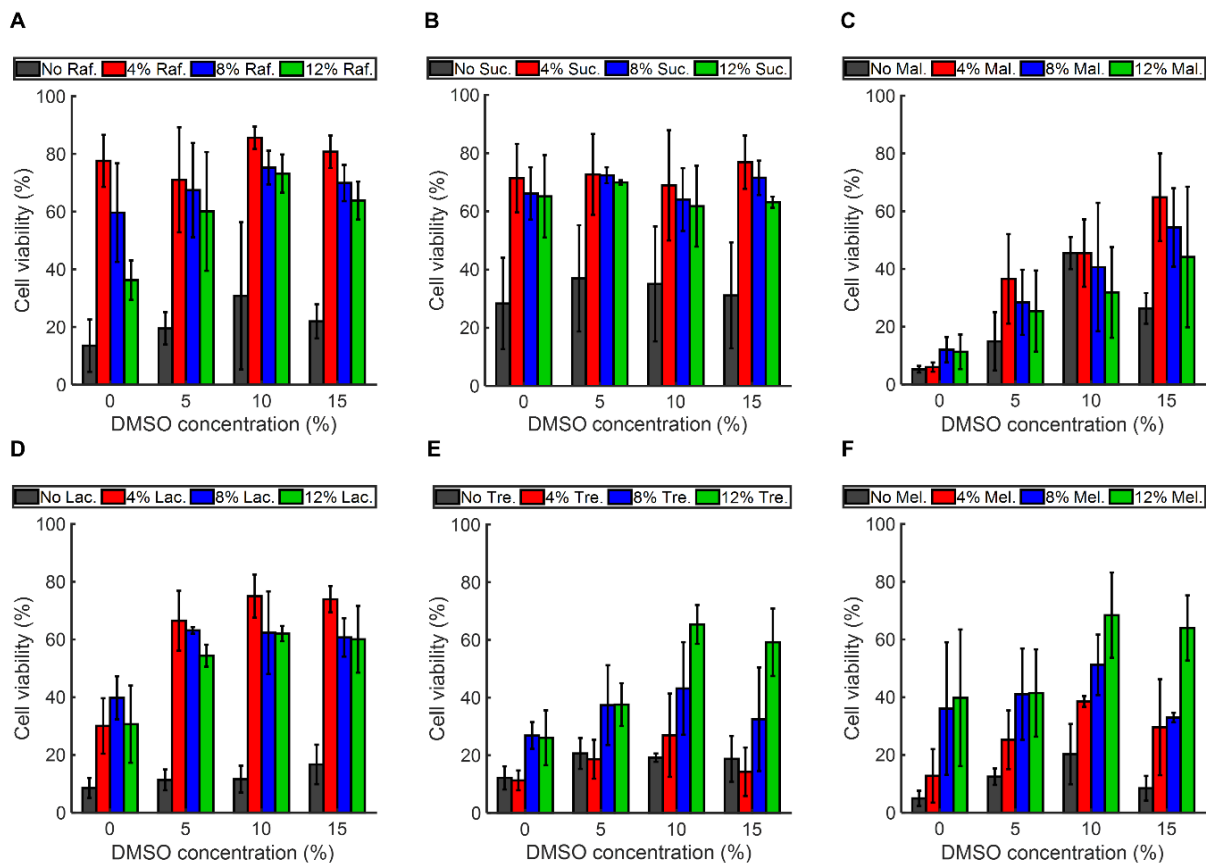

**Figure S8.**

**Cell viability in GelMA hydrogels with different concentrations of DMSO and saccharides cryopreserved for 72 h. (A), Raffinose. (B), Sucrose. (C), Maltose. (D), Lactose. (E), Trehalose. (F), Melezitose. n=3.**

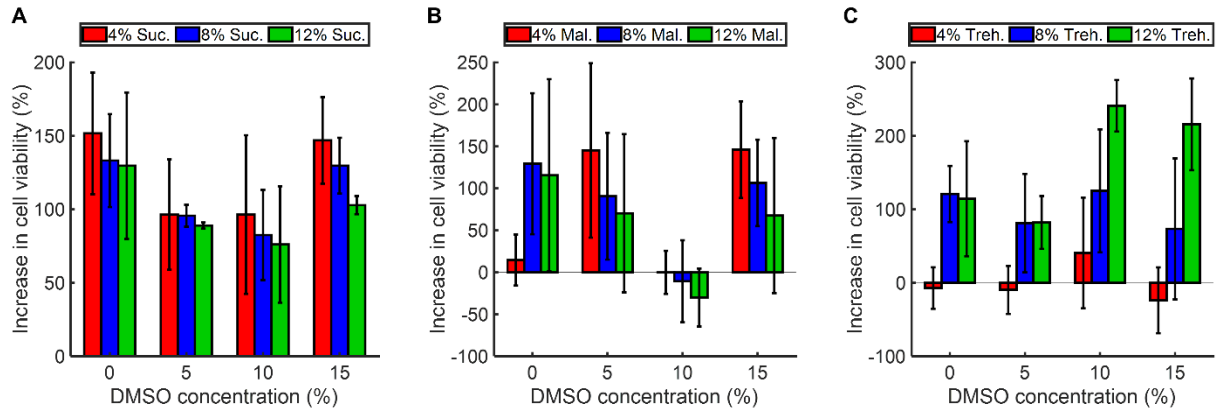

**Figure S9.**

**Quantified increases in cell viability post-cryopreservation for 72 h due to supplementing the cryoprotectant bioink with different saccharides. (A), Sucrose. (B), Maltose. (C), Trehalose. n=3.**

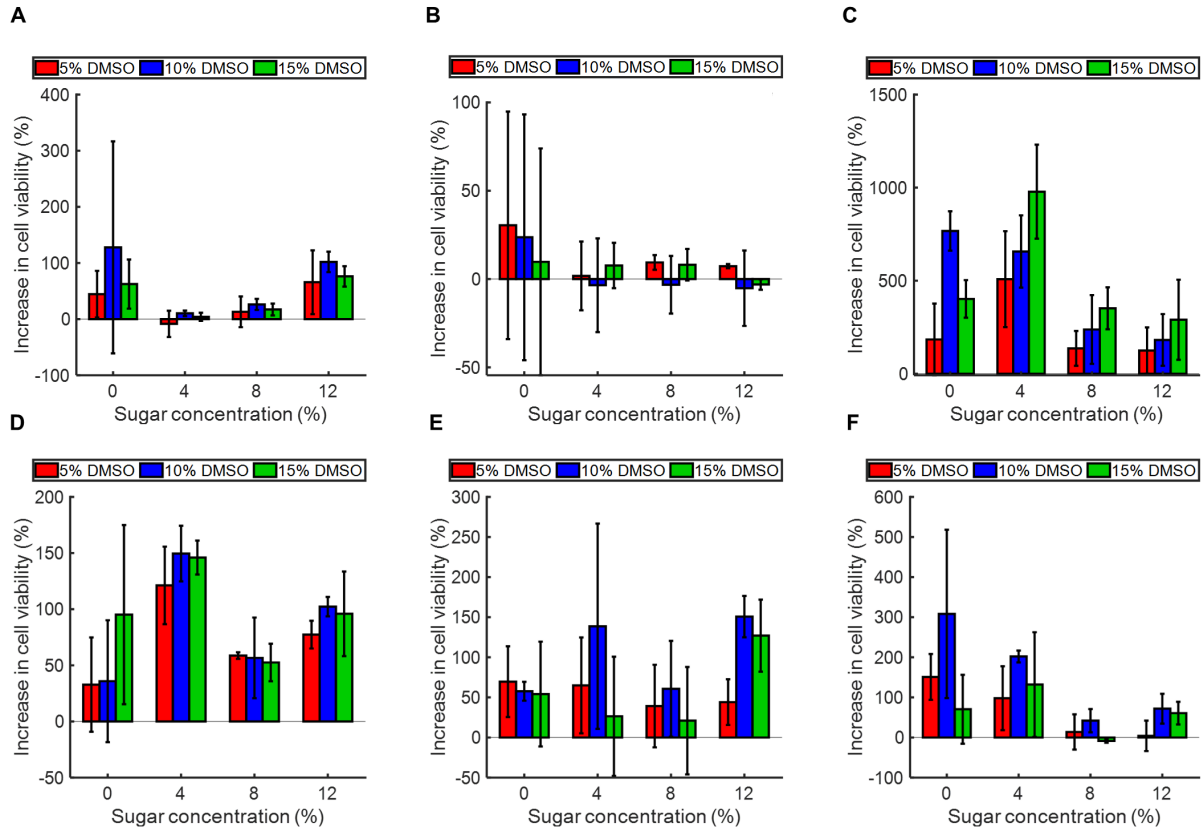

**Figure S10.**

**Quantification of the effect of DMSO in the cryoprotectant bioink formulations on enhancing cell viability post-cryopreservation for 72 h. (A), Raffinose. (B), Sucrose. (C), Maltose. (D), Lactose. (E), Trehalose. (F), Melezitose. n=3.**

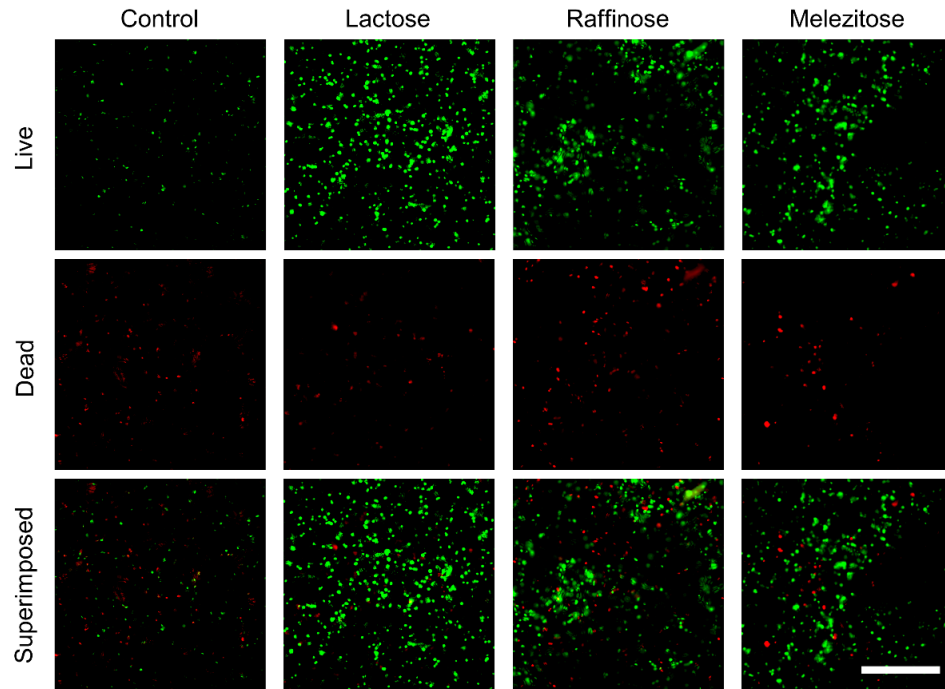

**Figure S11.**

**Representative fluorescence images of the NIH/3T3 fibroblasts encapsulated in the selected cryoprotective bioinks and frozen for 72 h. Scale bar: 500  $\mu\text{m}$ .**

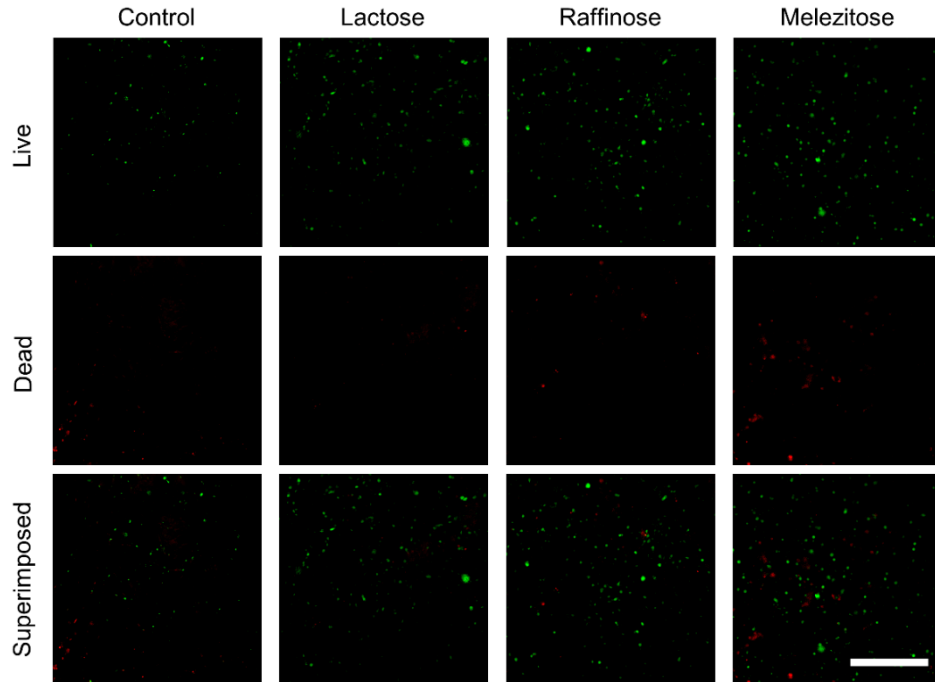

**Figure S12.**

**Representative fluorescence images of the HepG2 cells encapsulated in the selected cryoprotective bioinks and frozen for 72 h. Scale bar: 500  $\mu$ m.**

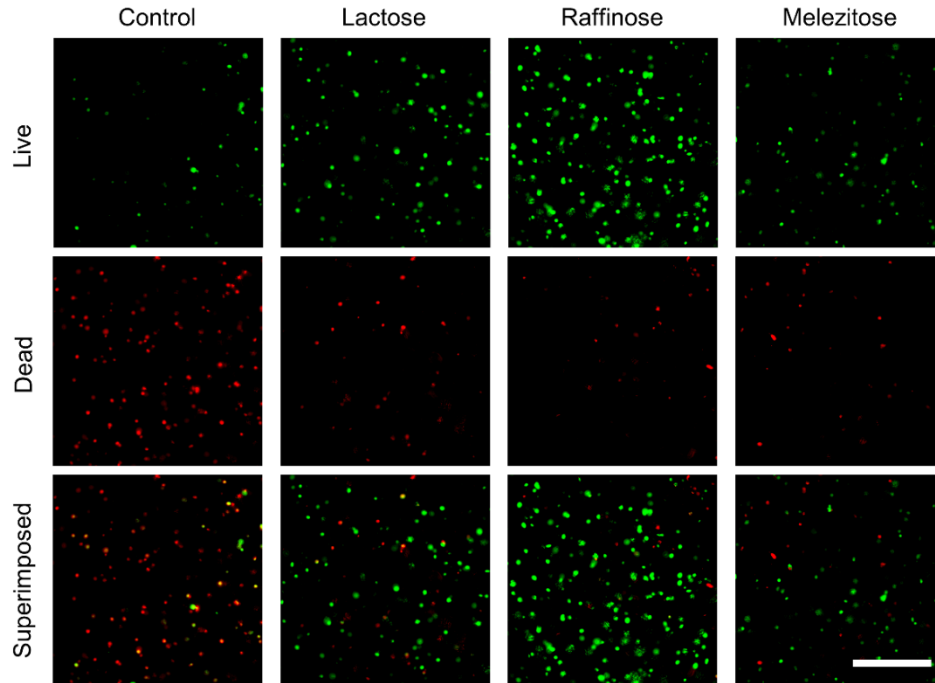

**Figure S13.**  
**Representative fluorescence images of the HUVECs encapsulated in the selected cryoprotective bioinks and frozen for 72 h. Scale bar: 500  $\mu$ m.**



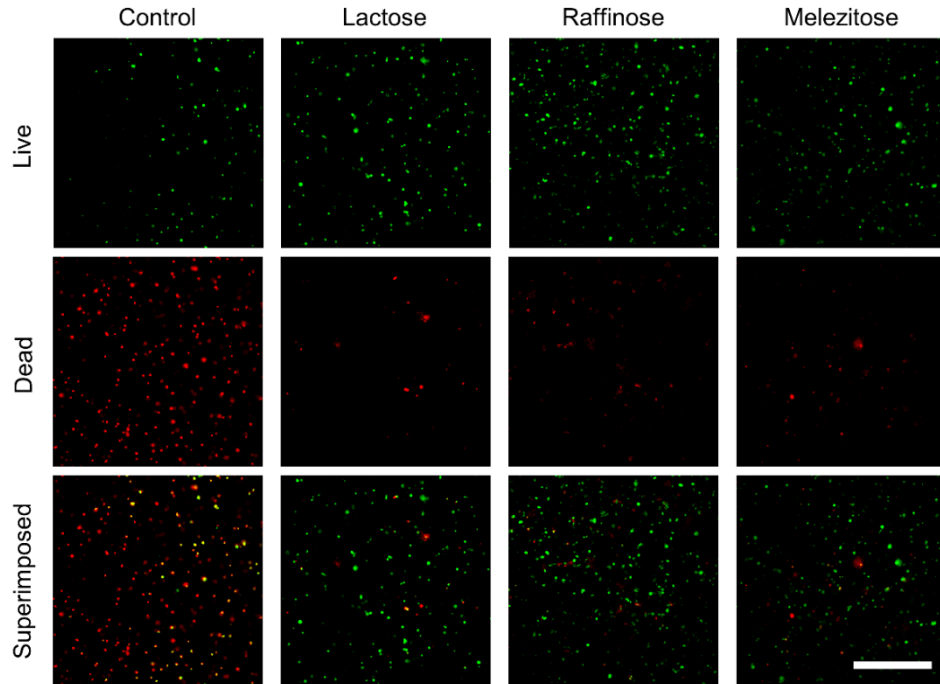

**Figure S14.**

**Representative fluorescence images of the MCF-7 cells encapsulated in the selected cryoprotective bioinks and frozen for 72 h. Scale bar: 500  $\mu\text{m}$ .**

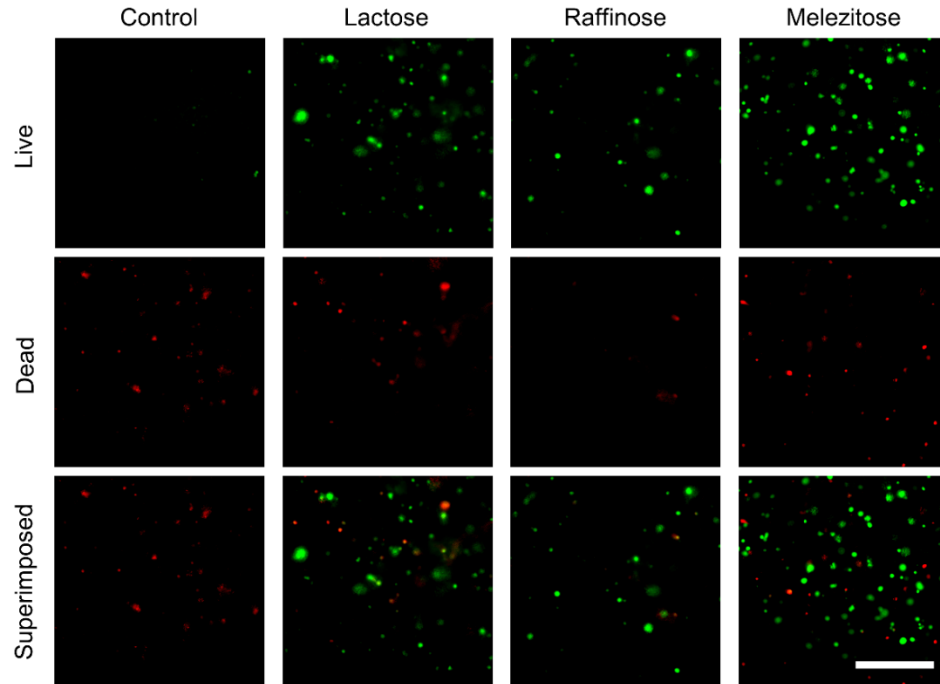

**Figure S15.**  
**Representative fluorescence images of the SMCs encapsulated in the selected cryoprotective biinks and frozen for 72 h. Scale bar: 500  $\mu$ m.**

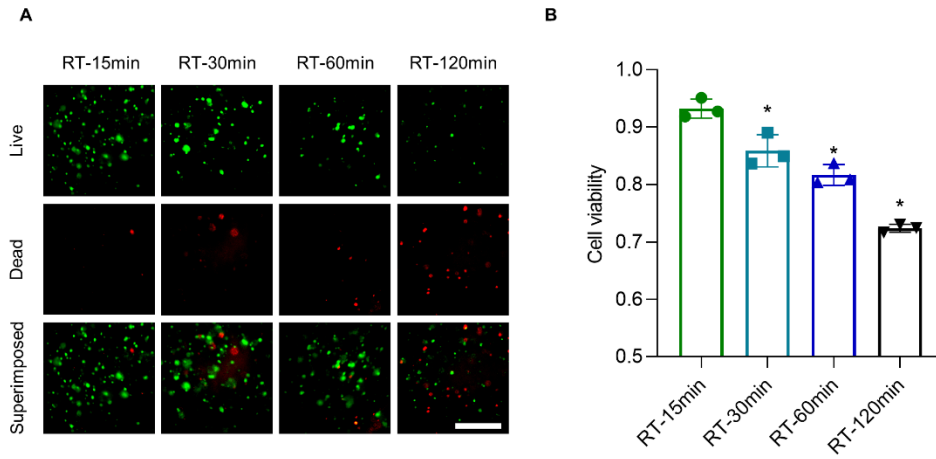

**Figure S16.**

**Effect of keeping NIH/3T3 cells in contact with the selected CPA (DMSO+melezitose) within GelMA for different timespans. (A), Fluorescence images. Scale bar: 500  $\mu$ m. (B), Quantification of cell viability. n = 3; \*P < 0.05.**

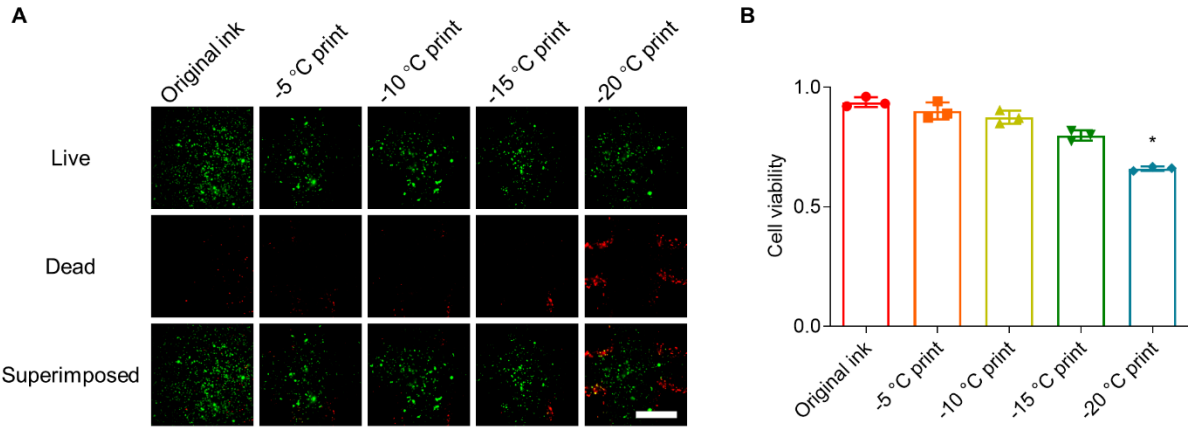

**Figure S17.**

**NIH/3T3 cell viability after cryobioprinting at different temperatures of the freezing plate.** (A), Fluorescence microscopy images showing viability of cells in the GelMA/CPA matrix. Scale bar: 500  $\mu\text{m}$ . (B), Quantification of cell viability.  $n = 3$ ; \* $P < 0.05$ .

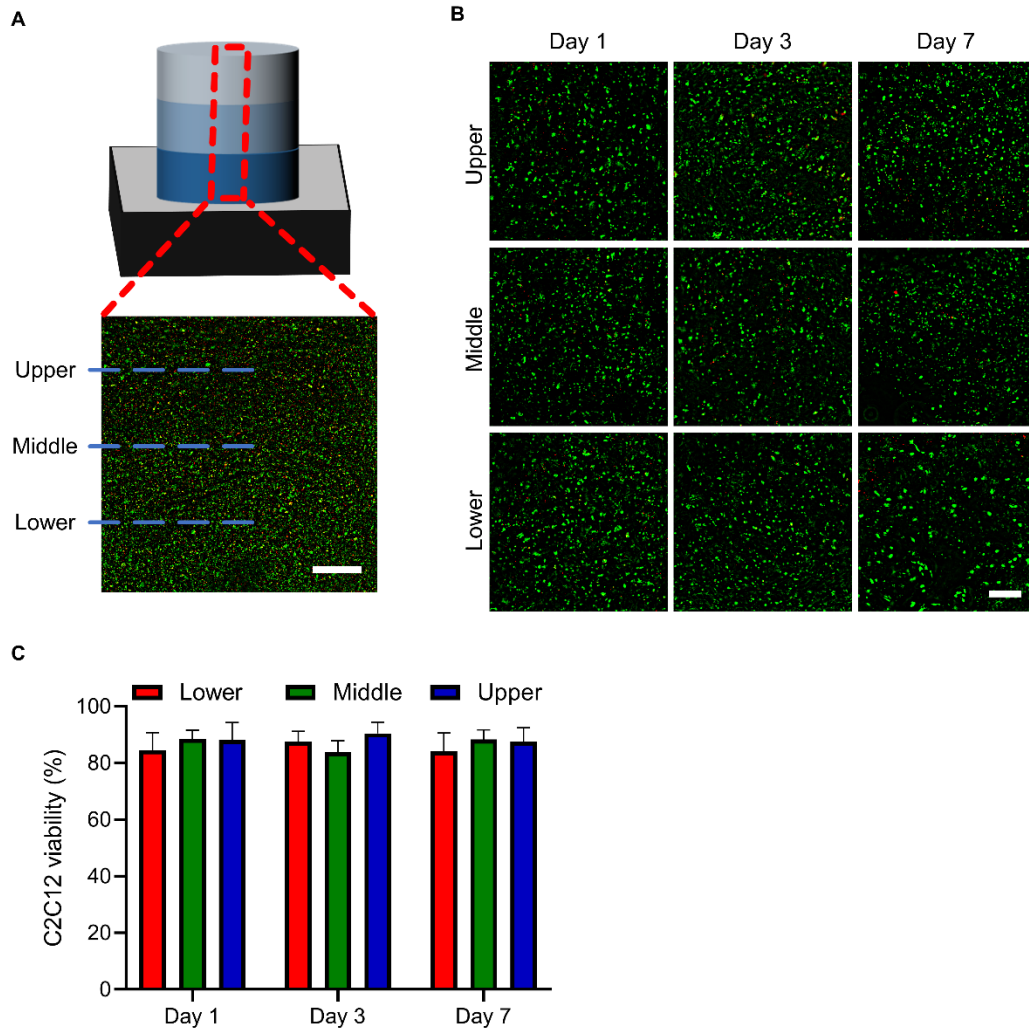

**Figure S18.**

**Cell viability of C2C12 myoblasts in different layers of cryobioprinted cell-laden constructs.** (A), Schematic and lateral live/dead images of the cryobioprinted scaffold. Scale bar: 2 mm. (B), Representative live/dead images of different layers on days 1, 3, and 7. Scale bar: 500  $\mu$ m. (C), Quantification of cell viability in different layers. n=3.

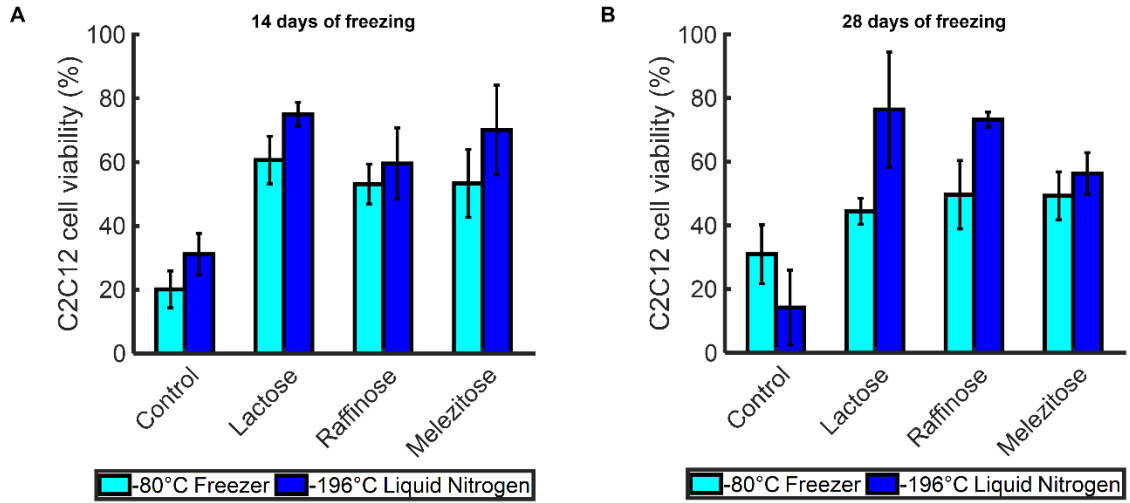

**Figure S19.**

**Effects of cryopreservation on cell viability at -80 °C and -196 °C (liquid nitrogen) in the cryoprotective bioinks with different formulations. (A), shorter-term. (B), longer-term. n=3.**

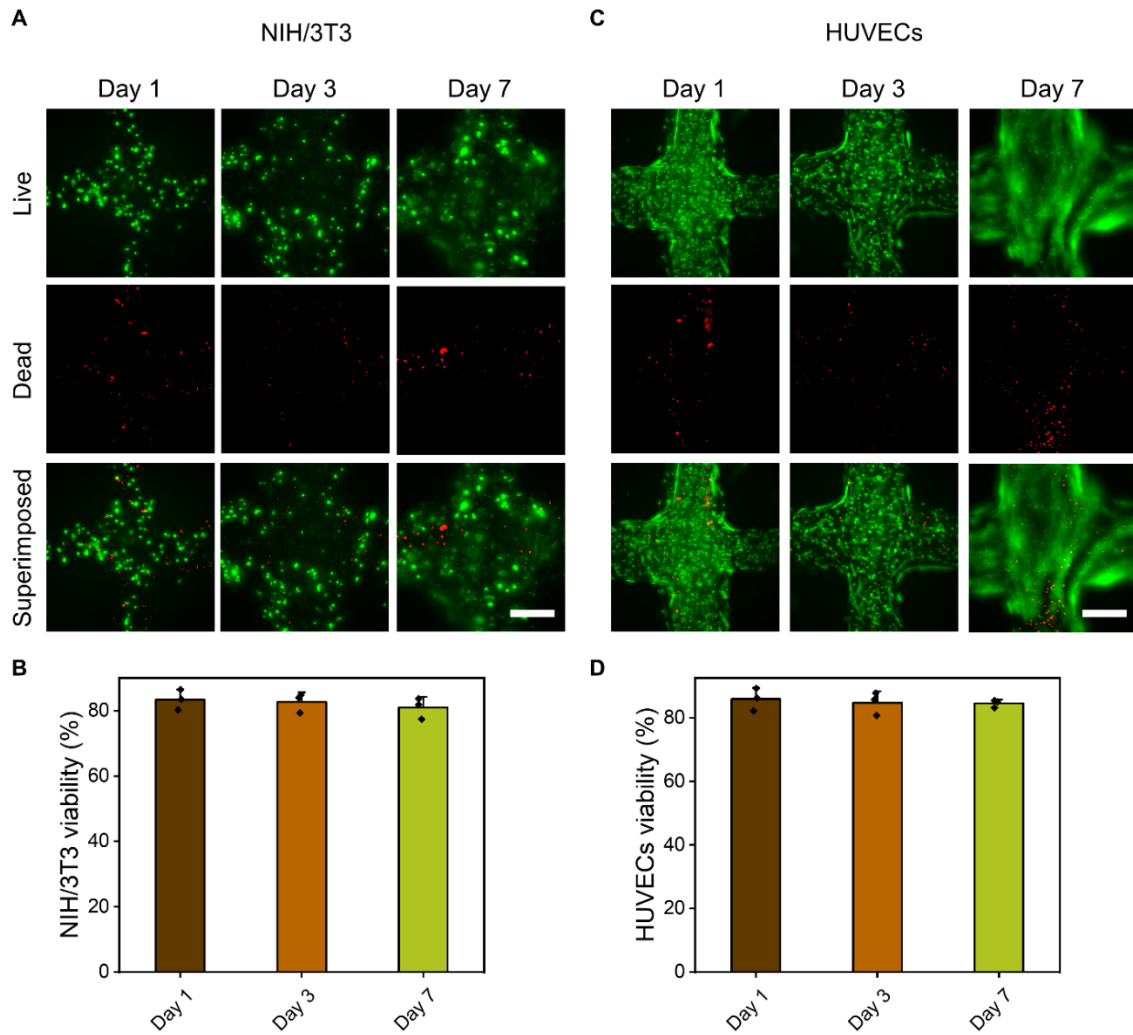

**Figure S20.**

Cell viability in cryobioprinted cell-laden constructs after 3 months of cryopreservation at -196 °C (liquid nitrogen), at different days post-revival. (A and B), NIH/3T3. (C and D), HUVECs. Scale bars: 500  $\mu$ m.

**Table S1.**

**Temperature control of the freezing plate at room temperature.**

| <b>Voltage<br/>(V)</b> | <b>Current<br/>(A)</b> | <b>Environment<br/>temperature (°C)</b> | <b>Cooling water<br/>temperature (°C)</b> | <b>Freezing plate<br/>temperature (°C)</b> |
|------------------------|------------------------|-----------------------------------------|-------------------------------------------|--------------------------------------------|
| 0                      | 0                      | 23.0                                    | 1.0                                       | 11.0                                       |
| 2.00                   | 0.47                   | 23.0                                    | 1.0                                       | -4.5                                       |
| 4.00                   | 0.96                   | 23.0                                    | 1.0                                       | -12.2                                      |
| 6.00                   | 1.48                   | 23.0                                    | 1.0                                       | -17.5                                      |
| 8.00                   | 1.98                   | 23.0                                    | 1.0                                       | -22.3                                      |
| 10.00                  | 2.49                   | 23.0                                    | 1.0                                       | -25.0                                      |
| 12.00                  | 3.01                   | 23.0                                    | 1.0                                       | -27.2                                      |



**Table S2.**

**Temperature control of the freezing plate in the cold room.**

| <b>Voltage<br/>(V)</b> | <b>Current<br/>(A)</b> | <b>Environment<br/>temperature (°C)</b> | <b>Cooling water<br/>temperature (°C)</b> | <b>Freezing plate<br/>temperature (°C)</b> |
|------------------------|------------------------|-----------------------------------------|-------------------------------------------|--------------------------------------------|
| 0                      | 0                      | 5.0                                     | 1.0                                       | 4.0                                        |
| 2.00                   | 0.47                   | 5.0                                     | 1.0                                       | -6.0                                       |
| 4.00                   | 0.97                   | 5.0                                     | 1.0                                       | -12.7                                      |
| 6.00                   | 1.49                   | 5.0                                     | 1.0                                       | -19.2                                      |
| 8.00                   | 2.03                   | 5.0                                     | 1.0                                       | -24.9                                      |
| 10.00                  | 2.55                   | 5.0                                     | 1.0                                       | -27.8                                      |
| 12.00                  | 3.04                   | 5.0                                     | 1.0                                       | -29.5                                      |

**Table S3.**

**Freezing rates in the first two layers for different values of  $T_p$ .** The values are derived from the heat-transfer simulation.

|                                              |                             | $T_p$ (°C) |           |           |           |
|----------------------------------------------|-----------------------------|------------|-----------|-----------|-----------|
|                                              |                             | <b>5</b>   | <b>10</b> | <b>15</b> | <b>20</b> |
| <b>Freezing rate<br/>(°C s<sup>-1</sup>)</b> | <b>1<sup>st</sup> layer</b> | 43.89      | 62.89     | 81.33     | 100.00    |
|                                              | <b>2<sup>nd</sup> layer</b> | 2.69       | 3.28      | 4.35      | 5.60      |

**Table S4.**  
**Heat-transfer simulation parameters.**

| <b>Parameter</b>                                         | <b>Value</b> |
|----------------------------------------------------------|--------------|
| Thermal conductivity ( $\text{W m}^{-1} \text{K}^{-1}$ ) | 0.57         |
| Density ( $\text{kg m}^{-3}$ )                           | 1,000        |
| Heat capacity ( $\text{J kg}^{-1} \text{K}^{-1}$ )       | 4,136        |
| Ratio of specific heats                                  | 1.33         |
| Bioink's initial temperature ( $^{\circ}\text{C}$ )      | 15           |
| Ambient temperature ( $^{\circ}\text{C}$ )               | 20           |
